# Supplementary material
Source: PubMed Central journal article supplement (PMC6879263)
Supplement: AAC.01636-19-s0001.pdf [file AAC.01636-19-s0001.pdf]

## Supplementary Data

### Co-occurrence of two *tet(X)* variants in an *Empedobacter brevis* of shrimp origin

Ruichao Li<sup>1,2,3</sup>, Ziyi Liu<sup>1,2</sup>, Kai Peng<sup>1,2</sup>, Yuan Liu<sup>1,2,3</sup>, Xia Xiao<sup>1,2</sup>, Zhiqiang Wang<sup>1,2\*</sup>

<sup>1</sup> College of Veterinary Medicine, Yangzhou University, Yangzhou, Jiangsu Province, P. R. China;

<sup>2</sup> Jiangsu Co-Innovation Center for Prevention and Control of Important Animal Infectious Diseases and Zoonoses, Yangzhou, Jiangsu Province, P. R. China;

<sup>3</sup> Institute of Comparative Medicine, Yangzhou University, Yangzhou, Jiangsu Province, P. R. China.

**Running title:** Genomic and functional analysis of novel *tet(X)* gene

**\*Corresponding author:** Prof. Zhiqiang Wang, Email: zqwang@yzu.edu.cn;

College of Veterinary Medicine, Yangzhou University, Yangzhou, Jiangsu Province, P. R. China.

**Key words:** tigecycline resistance, plasmids, *tet(X)* variants, nanopore sequencing

**Supplementary Table 1. MIC values (mg/L) of different antimicrobials among strains in this study.**

| Strains             | antimicrobials <sup>a</sup> |       |     |     |     |     |     |     |     |     |     |     |     |     |     |
|---------------------|-----------------------------|-------|-----|-----|-----|-----|-----|-----|-----|-----|-----|-----|-----|-----|-----|
|                     | TET                         | TIG   | DOX | OTC | MIN | CL  | ATM | CQM | ENR | FFC | MEM | AMX | KAN | RFP | STR |
| SE1-3               | 128                         | 32    | 64  | /   | /   | >64 | 4   | 2   | 4   | 4   | 8   | 128 | >64 | 16  | 16  |
| BL21-pET28a-tetX3.2 | 64                          | 8     | 16  | 64  | 32  | /   | /   | /   | /   | /   | /   | /   | /   | /   | /   |
| BL21                | ≤0.5                        | ≤0.25 | 0.5 | 4   | 0.5 | /   | /   | /   | /   | /   | /   | /   | /   | /   | /   |

<sup>a</sup> TET, tetracycline; TIG, tigecycline; DOX, doxycycline; OTC, oxytetracycline; MIN, minocycline; CL, colistin; ATM, aztreonam; CQM, cefquinome; ENR, enrofloxacin; FFC, florfenicol; MEM, meropenem; AMX, amoxicillin; KAN, kanamycin; REF, rifampin; STR, streptomycin.
